# Supplementary material
Source: MDPI journal article supplement (https://www.mdpi.com/1999-4907/10/11/947)
Supplement: s1 [file s1]

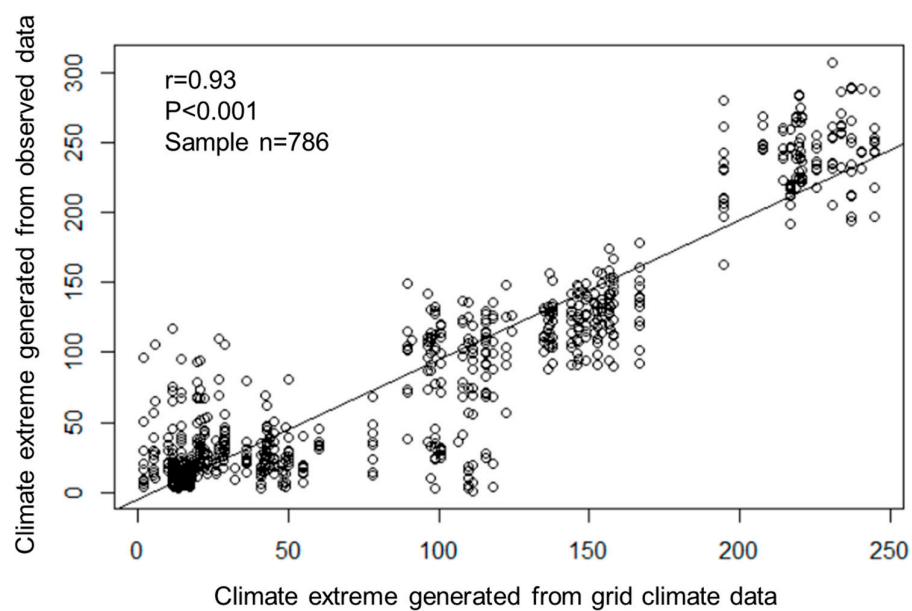

**Figure S1.** Validation of grid climate data. Pearson coefficient and p value were confirmed by comparing observed meteorological data and grid data that used in this study.
